# Supplementary material
Source: PubMed Central journal article supplement (PMC6706312)
Supplement: NIHMS1526008-supplement-1.pdf [file NIHMS1526008-supplement-1.pdf]

## Supporting Information

### The influence of cyclic tensile strain on multi-compartment collagen- GAG scaffolds for tendon-bone junction **repair**

William K. Grier<sup>1</sup>, Raul A. Sun Han Chang<sup>1</sup>, Matthew D. Ramsey<sup>1</sup>, Brendan A.C. Harley<sup>1,2\*</sup>

<sup>1</sup> Dept. Chemical and Biomolecular Engineering

<sup>2</sup> Carl R. Woese Institute for Genomic Biology

University of Illinois at Urbana-Champaign

Urbana, IL 61801

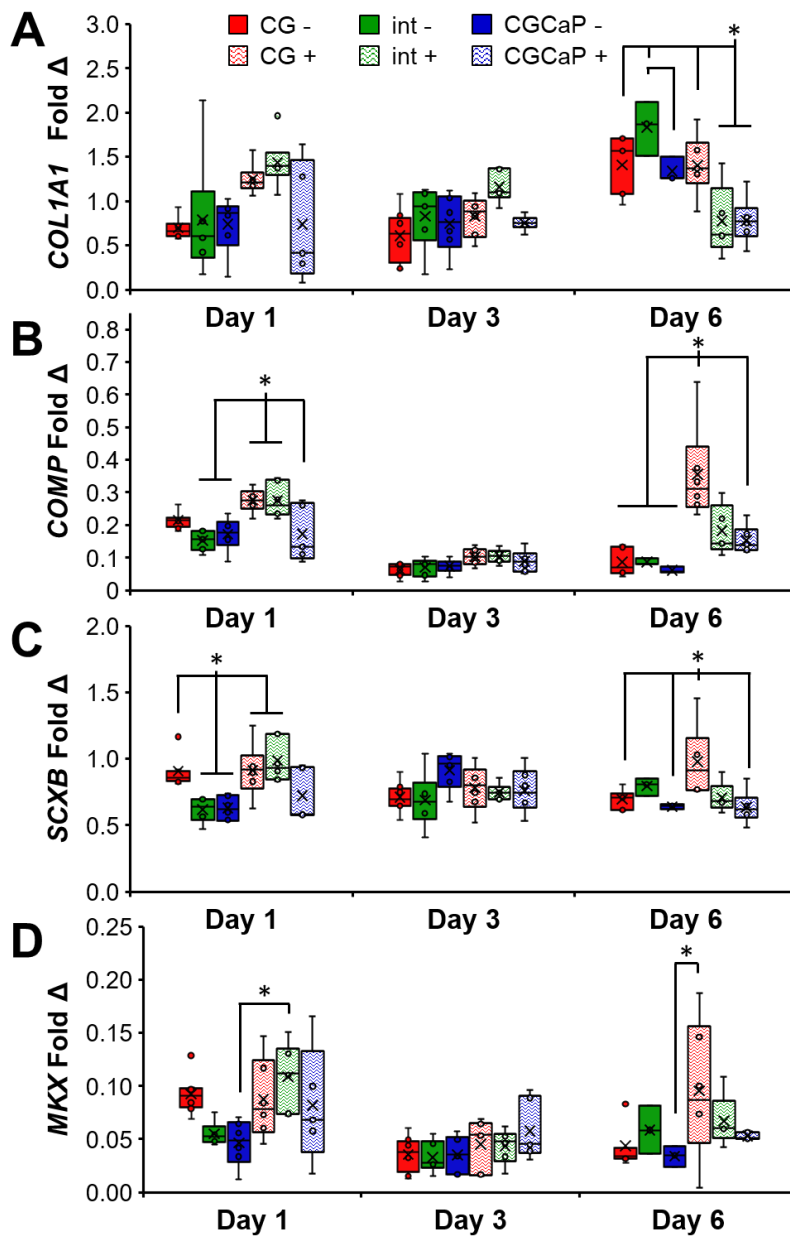

**Supplementary Figure 1.** Gene expression levels of **(A)** *COL1A1*, **(B)** *COMP*, **(C)** *SCXB*, and **(D)** *MKX* with and without CTS across the full scaffold at days 1, 3, and 6 ( $n = 6$ ). \*:  $p < 0.05$ .

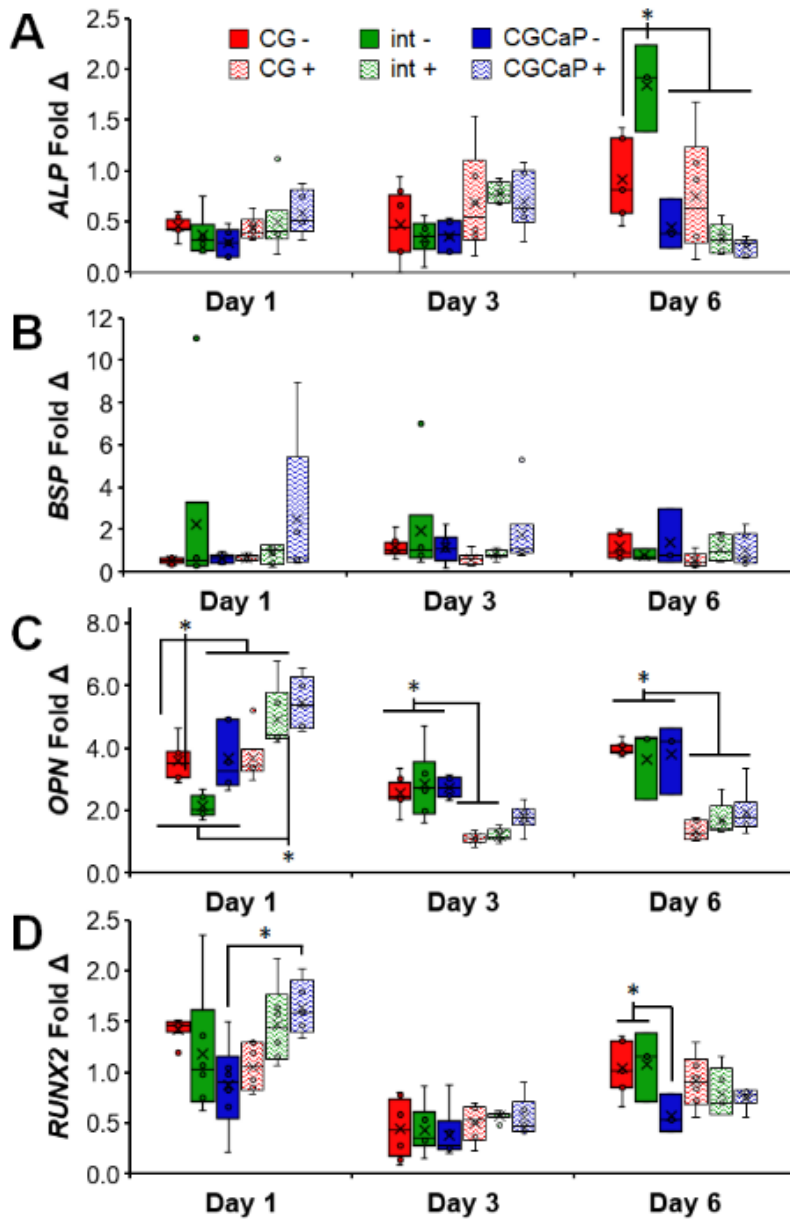

**Supplementary Figure 2.** Gene expression levels of **(A)** *ALP*, **(B)** *BSP*, **(C)** *OPN*, and **(D)** *RUNX2* with and without CTS across the full scaffold at days 1, 3, and 6 ( $n = 6$ ). \*:  $p < 0.05$ .
